# Supplementary material for: Exploring the Chemical Composition of Bulgarian Lavender Absolute (Lavandula Angustifolia Mill.) by GC/MS and GC-FID
Source: MDPI journal article supplement (doi:10.3390/plants11223150), 2022-11-17
Supplement: s1 [file s1]

**Table S1.** Chemical composition of LA samples, in rel. %, as determined by GC/MS/FID on a DB-17HT column.

| No  | LRI <sub>exp</sub> | Compound                                                           | Lavender absolute rel. %, as determined by GC-FID on DB-17HT |       |       |       |       |       |                   | ISO 3515:2002 |
|-----|--------------------|--------------------------------------------------------------------|--------------------------------------------------------------|-------|-------|-------|-------|-------|-------------------|---------------|
|     |                    |                                                                    | LA1                                                          | LA2   | LA3   | LA4   | LA5   | LA6   | LA7               |               |
| 1.  | 759                | Ethanol                                                            | 0.56                                                         | 0.20  | 0.91  | 1.22  | 0.16  | 1.40  | 0.05              |               |
| 2.  | 765                | Ethyl formate                                                      | 0.12                                                         | 0.08  | 0.09  | 0.09  | 0.05  | 0.06  | 0.06              |               |
| 3.  | 771                | Acetic acid                                                        | 0.11                                                         | 0.09  | 0.10  | 0.11  | 0.08  | 0.11  | 0.31              |               |
| 4.  | 780                | Ethyl acetate                                                      | 0.09                                                         | 0.05  | 0.06  | 0.08  | 0.02  | 0.02  | 0.04              |               |
| 5.  | 815                | Acetal                                                             | 0.02                                                         | n.d.  | 0.01  | 0.02  | n.d.  | 0.01  | n.d.              |               |
| 6.  | 839                | n-Hexyl formate                                                    | 0.08                                                         | 0.05  | 0.19  | 0.19  | 0.17  | 0.14  | n.d.              |               |
| 7.  | 845                | $\alpha$ -Pinene                                                   | 0.05                                                         | 0.05  | 0.03  | 0.03  | 0.02  | 0.03  | n.d.              |               |
| 8.  | 968                | $\beta$ -Myrcene                                                   | 0.19                                                         | 0.26  | 0.19  | 0.21  | 0.15  | 0.31  | 2.15              |               |
| 9.  | 1051               | 1-Octen-3-ol                                                       | 0.20                                                         | 0.12  | 0.27  | 0.27  | 0.26  | 0.25  | 0.05              |               |
| 10. | 1067               | 3-Octanol                                                          | 0.15                                                         | 0.13  | 0.53  | 0.52  | 0.51  | 0.51  | n.d.              |               |
| 11. | 1100               | 3-Octanone                                                         | 0.59                                                         | 0.43  | 1.15  | 1.15  | 1.07  | 0.97  | n.d.              | 0.2-1.6       |
| 12. | 1107               | Limonene                                                           | 0.12                                                         | 0.08  | 0.08  | 0.08  | 0.07  | 0.09  | n.d.              | <0.6          |
| 13. | 1118               | n-Hexyl acetate                                                    | 0.30                                                         | 0.29  | 0.41  | 0.41  | 0.38  | 0.24  | n.d.              |               |
| 14. | 1125               | <i>cis</i> - $\beta$ -Ocimene                                      | 1.40                                                         | 0.97  | 0.39  | 0.43  | 0.30  | 0.49  | 1.22              | 3.0-9.0       |
| 15. | 1133               | <i>trans</i> - $\beta$ -Ocimene                                    | 0.71                                                         | 0.61  | 0.52  | 0.61  | 0.37  | 0.63  | 1.42              | 2.0-5.0       |
| 16. | 1135               | 1,8-Cineole                                                        | 0.68                                                         | 0.74  | 0.36  | 0.35  | 0.34  | 0.30  | n.d.              | <2.0          |
| 17. | 1151               | $\gamma$ -Terpinene                                                | 0.07                                                         | 0.03  | 0.03  | 0.04  | 0.02  | 0.03  | n.d.              |               |
| 18. | 1185               | Linalool oxide                                                     | 0.35                                                         | 0.20  | 0.55  | 0.52  | 0.59  | 0.28  | 0.15              |               |
| 19. | 1214               | Linalool+ 3-Octanol, acetate <sup>1</sup>                          | 31.67                                                        | 27.33 | 38.12 | 37.30 | 38.24 | 36.12 | 20.74             | 22.0-34.0     |
| 20. | 1221               | 1-Octen-3-yl acetate                                               | 0.74                                                         | 0.60  | 0.63  | 0.54  | 0.63  | 0.68  | 0.39              |               |
| 21. | 1227               | neo-allo-Ocimene/Alloocomene                                       | 0.12                                                         | 0.07  | 0.02  | 0.03  | n.d.  | 0.03  | 0.36              |               |
| 22. | 1244               | n-Hexyl isobutyrate                                                | 0.07                                                         | 0.08  | 0.15  | 0.15  | 0.15  | 0.10  | 1.32              |               |
| 23. | 1257               | 1,3,5-Undecatriene                                                 | 0.03                                                         | 0.04  | 0.03  | 0.03  | 0.02  | 0.04  | n.d.              |               |
| 24. | 1272               | Cyclohexen-1-ol                                                    | 0.05                                                         | 0.04  | 0.04  | 0.04  | 0.04  | 0.03  | 0.05              |               |
| 25. | 1275               | <i>trans, trans</i> -2,4-Octadecadienal                            | n.d.                                                         | n.d.  | 0.02  | 0.02  | 0.02  | n.d.  | n.d.              |               |
| 26. | 1299               | Lavandulol                                                         | 1.03                                                         | 1.40  | 2.59  | 2.57  | 2.55  | 2.43  | 1.36              | >0.3          |
| 27. | 1314               | 4-Terpineol                                                        | 6.50                                                         | 5.66  | 3.11  | 3.05  | 3.12  | 3.22  | 6.32              | 2.0-5.0       |
| 28. | 1320               | Camphor                                                            | 0.23                                                         | 0.34  | 0.11  | 0.11  | 0.11  | 0.12  | 0.30              | <0.6          |
| 29. | 1330               | Linalool oxide (2-(5-Methyl-5-vinyltetrahydro-1-furyl)-2-propanol) | 0.07                                                         | n.d.  | 0.13  | n.d.  | 0.12  | 0.10  | 0.12              |               |
| 30. | 1332               | Phenyl ethyl alcohol                                               | 0.25                                                         | 0.61  | 0.56  | 0.68  | 0.57  | 0.13  | 0.10              |               |
| 31. | 1337               | $\alpha$ -Terpineol                                                | 0.30                                                         | 0.39  | 0.57  | 0.56  | 0.58  | 0.55  | 0.53              | 0.8-2.0       |
| 32. | 1351               | Citronellol                                                        | 0.06                                                         | 0.09  | 0.05  | 0.06  | 0.06  | 0.08  | 0.08              |               |
| 33. | 1371               | Isobornyl propionate                                               | 0.05                                                         | 0.08  | 0.06  | 0.06  | 0.06  | 0.07  | 0.55              |               |
| 34. | 1377               | p-Cymen-8-ol                                                       | n.d.                                                         | n.d.  | n.d.  | n.d.  | n.d.  | n.d.  | 0.44              |               |
| 35. | 1383               | Linalyl acetate+Cryptone <sup>1</sup>                              | 36.98                                                        | 35.81 | 27.64 | 27.09 | 28.43 | 26.58 | 0.36 <sup>2</sup> | 30.0-42.0     |
| 36. | 1389               | <i>trans</i> -Carveol                                              | 0.04                                                         | 0.06  | 0.03  | 0.03  | 0.03  | 0.03  | n.d.              |               |
| 37. | 1402               | Geranyl ethyl ether 1 and 2                                        | n.d.                                                         | n.d.  | n.d.  | n.d.  | n.d.  | n.d.  | 0.29              |               |
| 38. | 1403               | Geranyl isobutyrate                                                | n.d.                                                         | 0.04  | 0.04  | 0.04  | 0.04  | 0.02  | n.d.              |               |
| 39. | 1407               | Geraniol                                                           | 0.07                                                         | 0.10  | 0.07  | 0.08  | 0.06  | 0.04  | 0.69              |               |
| 40. | 1410               | exo-2-Hydroxycineole                                               | 0.02                                                         | 0.04  | 0.03  | 0.04  | 0.04  | 0.03  | 0.06              |               |
| 41. | 1427               | Lavandulyl acetate                                                 | 1.47                                                         | 2.94  | 1.80  | 1.76  | 1.87  | 2.21  | 4.45              | 2.0-5.0       |
| 42. | 1433               | $\alpha$ -Fenchyl acetate                                          | 0.11                                                         | 0.17  | 0.05  | 0.06  | 0.06  | 0.06  | 0.47              |               |
| 43. | 1438               | Cuminic aldehyde                                                   | 0.11                                                         | 0.15  | 0.12  | 0.12  | 0.12  | 0.14  | 0.19              |               |
| 44. | 1449               | Piperitone                                                         | 0.03                                                         | 0.03  | 0.03  | 0.03  | 0.04  | 0.01  | n.d.              |               |
| 45. | 1458               | <i>trans</i> - $\alpha$ -Bergamone (isomer)                        | 0.20                                                         | 0.21  | 0.25  | 0.31  | 0.27  | 0.21  | 0.37              |               |

| or <i>cis</i> - $\alpha$ -Bergamone |      |                                        |      |      |      |      |      |      |      |
|-------------------------------------|------|----------------------------------------|------|------|------|------|------|------|------|
| 46.                                 | 1470 | $\beta$ -Bourbonene                    | n.d. | n.d. | 0.06 | 0.31 | 0.07 | 0.07 | n.d. |
| 47.                                 | 1480 | Fenchone                               | 0.02 | 0.04 | n.d. | n.d. | 0.03 | 0.02 | n.d. |
| 48.                                 | 1484 | Zingberene                             | 0.02 | 0.04 | 0.04 | 0.08 | 0.05 | 0.05 | 0.11 |
| 49.                                 | 1497 | Hexenoic acid hexyl ester              | 0.07 | 0.10 | 0.17 | 0.18 | 0.17 | 0.13 | 0.09 |
| 50.                                 | 1504 | $\alpha$ -Santolene                    | 0.34 | 0.41 | 0.39 | 0.39 | 0.40 | 0.45 | 1.11 |
| 51.                                 | 1506 | p-Cymen-7-ol                           | 0.08 | 0.10 | 0.13 | 0.14 | 0.13 | 0.12 | 0.16 |
| 52.                                 | 1510 | <i>trans</i> - $\alpha$ -Bergamotene   | 0.04 | 0.05 | 0.04 | 0.05 | 0.04 | 0.05 | 0.10 |
| 53.                                 | 1522 | Nerolidol                              | n.d. | n.d. | n.d. | n.d. | n.d. | n.d. | 7.77 |
| 54.                                 | 1523 | <i>trans</i> - $\beta$ -Caryophyllene  | 3.01 | 3.41 | 2.97 | 3.05 | 2.78 | 4.34 | 3.54 |
| 55.                                 | 1547 | $\alpha$ -Amorphene                    | 0.02 | 0.03 | 0.03 | 0.03 | 0.03 | 0.03 | 0.09 |
| 56.                                 | 1551 | Geranyl acetate                        | 0.09 | 0.23 | 0.16 | 0.16 | 0.16 | 0.14 | 5.73 |
| 57.                                 | 1557 | Piperitenone                           | 0.05 | 0.07 | n.d. | n.d. | 0.03 | 0.03 | n.d. |
| 58.                                 | 1561 | <i>trans</i> - $\beta$ -Farnesene      | 0.86 | 3.26 | 5.06 | 5.20 | 5.11 | 6.42 | 1.93 |
| 59.                                 | 1567 | $\alpha$ -Humulene                     | 0.14 | 0.18 | 0.16 | 0.16 | 0.15 | 0.20 | 0.40 |
| 60.                                 | 1576 | Butyl benzoate                         | 0.04 | 0.05 | 0.06 | 0.06 | 0.06 | 0.07 | 0.14 |
| 61.                                 | 1584 | $\beta$ -Farnesene isomer              | 0.05 | 0.06 | 0.07 | 0.07 | 0.06 | 0.07 | 0.17 |
| 62.                                 | 1602 | Germacrene D                           | 0.21 | 0.28 | 0.28 | 0.33 | 0.20 | 0.83 | 0.34 |
| 63.                                 | 1616 | $\beta$ -Bisabolene                    | 0.08 | 0.09 | 0.10 | 0.09 | 0.10 | 0.10 | 0.18 |
| 64.                                 | 1625 | $\alpha$ - Farnesene                   | n.d. | 0.02 | 0.03 | 0.03 | 0.03 | 0.04 | n.d. |
| 65.                                 | 1645 | $\gamma$ -Cadinene                     | 0.16 | 0.25 | 0.10 | 0.10 | 0.10 | 0.14 | 0.46 |
| 66.                                 | 1650 | $\beta$ -Santalol                      | 0.09 | 0.12 | 0.05 | 0.05 | 0.05 | 0.06 | 0.31 |
| 67.                                 | 1704 | Farnesol                               | 0.02 | 0.05 | 0.06 | 0.05 | 0.06 | 0.04 | 0.03 |
| 68.                                 | 1715 | Aromadendrene oxide                    | 0.04 | 0.02 | 0.03 | 0.03 | 0.04 | n.d. | n.d. |
| 69.                                 | 1723 | Caryophyllene oxide                    | 0.06 | 0.06 | 0.11 | 0.10 | 0.13 | 0.07 | 0.17 |
| 70.                                 | 1731 | <i>trans</i> -Sesquisabinene hydrate   | n.d. | n.d. | 0.04 | 0.04 | 0.04 | 0.04 | 0.04 |
| 71.                                 | 1756 | Spathulenol                            | 0.04 | 0.05 | 0.04 | 0.04 | 0.03 | 0.03 | n.d. |
| 72.                                 | 1767 | Caryophyllene oxide                    | 1.23 | 1.03 | 1.36 | 1.25 | 1.59 | 0.88 | 2.71 |
| 73.                                 | 1787 | Coumarine                              | 1.25 | 2.44 | 1.25 | 1.23 | 1.22 | 1.33 | 10.9 |
| 74.                                 | 1793 | Geranyl geraniol                       |      | 0.02 | 0.05 | 0.04 | 0.04 | 0.05 | n.d. |
| 75.                                 | 1825 | $\tau$ -Cadinol                        | 0.32 | 0.53 | 0.22 | 0.21 | 0.22 | 0.27 | 1.04 |
| 76.                                 | 1837 | Caryophylla-4(12),8(13)-dien-5-beta-ol | 0.07 | 0.06 | 0.07 | 0.06 | 0.07 | 0.04 | 0.17 |
| 77.                                 | 1858 | 15-Hydroxy $\alpha$ - Muurolene)       | 0.03 | 0.03 | 0.05 | 0.05 | 0.06 | 0.04 | 0.17 |
| 78.                                 | 1870 | Alloaromadendrene oxide                | 0.27 | 0.20 | 0.20 | 0.19 | 0.22 | 0.10 | n.d. |
| 79.                                 | 1873 | Caryophyllenol                         | n.d. | n.d. | n.d. | n.d. | n.d. | n.d. | 0.59 |
| 80.                                 | 1881 | Farnesol 2                             | 0.07 | 0.09 | 0.12 | 0.12 | 0.12 | 0.12 | n.d. |
| 81.                                 | 1918 | $\alpha$ -Santalol                     | 0.07 | 0.09 | 0.05 | 0.05 | 0.05 | 0.05 | n.d. |
| 82.                                 | 1921 | $\beta$ -Santalol (isomer)             | 0.07 | 0.09 | 0.05 | 0.04 | 0.05 | 0.05 | 0.27 |
| 83.                                 | 1934 | Muurol-5-en-4-one                      | 0.05 | 0.07 | 0.04 | 0.04 | 0.04 | 0.04 | 0.15 |
| 84.                                 | 1953 | Hexahydrofarnesyl acetone              | 0.08 | 0.09 | 0.07 | 0.07 | 0.08 | 0.10 | 0.20 |
| 85.                                 | 1964 | Geranyl linalool isomer B              | n.d. | n.d. | n.d. | n.d. | n.d. | n.d. | 0.13 |
| 86.                                 | 1970 | Nerolidol                              | n.d. | n.d. | n.d. | n.d. | n.d. | n.d. | 0.13 |
| 87.                                 | 1998 | Farnesol isomer A                      | n.d. | n.d. | n.d. | n.d. | n.d. | n.d. | 0.09 |
| 88.                                 | 2026 | <i>trans</i> -Sesquisabinene hydrate   | n.d. | n.d. | n.d. | n.d. | n.d. | n.d. | 0.19 |
| 89.                                 | 2109 | Hexadecanoic acid, ethyl ester         | n.d. | n.d. | n.d. | n.d. | n.d. | n.d. | 0.50 |
| 90.                                 | 2116 | Muurola-4,10(14)-dien-1-beta-ol        | 0.06 | 0.07 | 0.05 | 0.12 | 0.05 | 0.05 | n.d. |
| 91.                                 | 2120 | Benzyl benzoate                        | 0.24 | 0.20 | 0.03 | 0.10 | 0.03 | 0.14 | 0.65 |
| 92.                                 | 2135 | Geranyl-p-cymene                       | n.d. | n.d. | n.d. | n.d. | n.d. | n.d. | 0.28 |
| 93.                                 | 2150 | Coumarin, 7-methoxy-                   | 0.89 | 1.48 | 0.56 | 0.57 | 0.57 | 0.60 | 3.83 |
| 94.                                 | 2225 | 9,12-Octadecadienoic acid, M           | n.d. | n.d. | n.d. | n.d. | n.d. | n.d. | 0.13 |
| 95.                                 | 2491 | 10-Hydroxy-4-cadinene-3-one            | 0.16 | 0.25 | 0.10 | 0.10 | 0.10 | 0.10 | 0.56 |
| 96.                                 | 2514 | Labda-8(20),12,14-triene               | n.d. | 0.02 | 0.06 | 0.05 | 0.05 | 0.06 | n.d. |

|                |              |                                                        |       |       |       |       |       |       |       |
|----------------|--------------|--------------------------------------------------------|-------|-------|-------|-------|-------|-------|-------|
| 97.            | 2571         | 1,6,10,14 Hexadecatetraen-3-ol, 3,7,11,15 tetramethyl- | n.d.  | n.d.  | n.d.  | n.d.  | n.d.  | n.d.  | 0.17  |
| 98.            | 2589         | 9,12-Octadecadienoic acid, ethyl ester                 | n.d.  | n.d.  | n.d.  | n.d.  | n.d.  | n.d.  | 0.12  |
| 99.            | 2661         | 9,12,15-Octadecatrienoic acid, ethyl ester             | n.d.  | n.d.  | n.d.  | n.d.  | n.d.  | n.d.  | 0.07  |
| 100            | 2679         | Hexadecanoic acid, hexyl ester                         | 0.02  | n.d.  | 0.07  | 0.08  | 0.07  | 0.23  | 0.08  |
| 101            | 2691         | Geranyl $\alpha$ -terpinene                            | n.d.  | 0.04  | 0.03  | 0.04  | 0.02  | 0.05  | 0.10  |
| 102            | 2718         | 9,12-Octadecadienoic acid, butyl ester                 | 0.03  | 0.02  | 0.09  | 0.12  | 0.08  | 0.13  | 0.07  |
| 103            | 2762         | 9,12,15-Octadecatrienoic acid, butyl ester             | n.d.  | n.d.  | 0.02  | 0.03  | 0.02  | 0.07  | n.d.  |
| 104            | 2796         | Geranyl palmitate                                      | 0.02  | 0.02  | 0.09  | 0.09  | 0.09  | 0.11  | 0.07  |
| 105            | 2891         | Geranyl oleate                                         | n.d.  | n.d.  | n.d.  | n.d.  | n.d.  | n.d.  | 0.18  |
| 106            | 2935         | Neryl ester (WAX)                                      | n.d.  | n.d.  | n.d.  | n.d.  | n.d.  | n.d.  | 0.22  |
| 107            | 3130         | Farnesyl acetate                                       | n.d.  | 0.01  | 0.04  | 0.05  | 0.04  | 0.04  | 0.04  |
| 108            | 3347         | $\beta$ -Amyrin                                        | n.d.  | 0.03  | n.d.  | 0.09  | 0.03  | 0.03  | 0.10  |
| 109            | 3393         | Clionasterol (Stigmast-5-en-3-ol(3-beta,24S)           | 0.06  | 0.09  | 0.10  | 0.13  | 0.09  | 0.13  | 0.31  |
| 110            | 3413         | $\alpha$ -Amyrin                                       | 0.03  | 0.05  | 0.03  | 0.14  | 0.05  | 0.05  | 0.06  |
| 111            | 3969         | Lupeol acetate                                         | 0.06  | 0.06  | 0.05  | n.d.  | 0.05  | 0.06  | 0.21  |
| Total          |              |                                                        | 97.43 | 94.28 | 96.05 | 94.96 | 95.70 | 97.31 | 95.25 |
| Monoterpenes   | Hydrocarbons |                                                        | 2.67  | 2.07  | 1.26  | 1.43  | 0.93  | 1.68  | 5.15  |
|                | Oxygenated   |                                                        | 80.55 | 75.73 | 75.68 | 74.07 | 76.66 | 72.60 | 52.83 |
| Sesquiterpenes | Hydrocarbons |                                                        | 5.51  | 8.90  | 9.77  | 10.38 | 9.64  | 13.29 | 8.71  |
|                | Oxygenated   |                                                        | 2.29  | 1.82  | 2.18  | 2.03  | 2.47  | 1.82  | 4.78  |
| Coumarins      |              |                                                        | 2.15  | 3.92  | 1.81  | 1.80  | 1.79  | 1.93  | 14.73 |
| Aromatics      |              |                                                        | 2.68  | 2.81  | 1.61  | 1.67  | 1.58  | 2.41  | 5.41  |
| Aliphatics     |              |                                                        | 3.22  | 2.30  | 4.96  | 4.57  | 3.80  | 4.98  | 2.43  |
